# Supplementary material for: Functional Characterization of Waterlogging and Heat Stresses Tolerance Gene Pyruvate decarboxylase 2 from Actinidia deliciosa
Source: Int J Mol Sci. 2017 Nov 9;18(11):2377. doi: 10.3390/ijms18112377 (PMC5713346; doi:10.3390/ijms18112377)
Supplement: Supplementary file 1 [file ijms-18-02377-s001.pdf]

**Table S1** - Sequence of primers used in this paper

| gene           | Primer names | Sequence5'-3'                          | usage                                                                              |
|----------------|--------------|----------------------------------------|------------------------------------------------------------------------------------|
| <i>AdPDC2</i>  | AF1          | <b><i>GGATCC</i></b> ATGGCAACCGCCACCCA | cDNA cloning and construction of plant Binary expression vector for transformation |
|                | AR1          | <b><i>GGTACC</i></b> TATTGAGGATTAGGAG  |                                                                                    |
|                | AF2          | TCATAATGGTGAAGGCAAATGCTG               | Expression of <i>AdPDC2</i> in kiwifruit                                           |
|                | AR2          | GCTCGTGTCTCCTTGGAAC                    |                                                                                    |
| <i>AdActin</i> | Act-F        | TGCATGAGCGATCAAGTTTCAAG                | <i>Actinidia deliciosa</i> housekeeping gene                                       |
|                | Act-R        | TGTCCCATGTCTGGTTGATGACT                |                                                                                    |
| AtUBQ10        | AtUBQ10-F    | GGACCAGCAGCGTCTCATCTTCGCT              | <i>Arabidopsis</i> housekeeping gene                                               |
|                | AtUBQ10-R    | CTTATTCATCAGGGATTATACAAG               |                                                                                    |

Notes: Italics base pairs indicated the restriction point;



|        |                                                                 |     |
|--------|-----------------------------------------------------------------|-----|
| AdPDC1 | MDSKIGALDVGKPPCNDVGSIPHNDVVSTLQSSP-ASTALNSAESTLGRHLARRLVQIGA    | 59  |
| AdPDC2 | -----MATAT.IGTASPAPFPGGTW.....V.....V                           | 35  |
| AtPDC1 | ..T...SI.DC..TNG..C.PTNGT.ATIHN.V.SSAITI.YCDA.....A.V           | 60  |
| AtPDC2 | ..T...SI.ACN.TNH.I.GP.NGG.STVQNT..LH..TVSPCDA....Y.....E..V     | 60  |
| AdPDC1 | TDVFSVPVDFNLTLDDLHIAEPGLNLIGCCNELNAGYAADGFARSRGVACVVTFVGGGL     | 119 |
| AdPDC2 | .....G.....A.....S.V.....Y..A.....                              | 95  |
| AtPDC1 | .....G.....M..D.....Y.....                                      | 120 |
| AtPDC2 | .....G.....N.K.....Y.....                                       | 120 |
| AdPDC1 | SVLNAIAGACSENLP LICIVGGPNSNDYGTNRILHHTIGLPDFSQELRCFQTVTCFQAVV   | 179 |
| AdPDC2 | .....Y.....V.....A.....A.....                                   | 155 |
| AtPDC1 | .....Y.....T.....A.....Y.....                                   | 180 |
| AtPDC2 | .....Y.....T.....A.....I.....                                   | 180 |
| AdPDC1 | NNLEDAHELIDTAISTALKECKPVYISISCNLPGLPHPTFRREPVPFVISPRLSNHMGLE    | 239 |
| AdPDC2 | ...D.....S.A.....I.....A.....YFLAQNV..QL...                     | 215 |
| AtPDC1 | ...D...Q..K.....S...V...AAI..H..S.D...SLA...K...                | 240 |
| AtPDC2 | ...E.....S.....AI.L...S.H...MLPMKV..QI..D                       | 240 |
| AdPDC1 | AAVEAAAEEFLNKAVKPVVMVGGPKLRVANASEAFVELADACGYPLAVMPSAKGLVPENHPH  | 299 |
| AdPDC2 | T.....L.....K.QK..M.....I.....G.....H...                        | 274 |
| AtPDC1 | .....TL.....K.CD.....S..A..M.....F..H...                        | 300 |
| AtPDC2 | .....L.....M...K.AD.....S..G.....Q...H.K.                       | 300 |
| AdPDC1 | FIGTYWGA VSTGFCAEIVESADAYLFAGPIFNDYSSVGYSLLLKRDKAII VQPD RVMIAN | 359 |
| AdPDC2 | .....SY.G.....V.V.....I..KE..V....N...T.G.                      | 334 |
| AtPDC1 | .....P..S.....I.....KE..V....ITV...                             | 360 |
| AtPDC2 | .....A.....KE.....T.G.                                          | 360 |
| AdPDC1 | GPAFGCVLMRDFLGALVKRLKQNTTAYENYHRIYVPEGHPLKCEPKEALRVNVLPQH IQK   | 419 |
| AdPDC2 | ..SL.W.F.A...T..A.K..K.S..L...R..F..P..I.A...R.ND.P...I..K...E  | 394 |
| AtPDC1 | ..T...I..S...FRE.S..V.R.E.....F...K...SR.P...TM...              | 420 |
| AtPDC2 | ..SE.A..I.H.N.S.....K..RDN.N.S.....N                            | 420 |
| AdPDC1 | MLSSETAVIAETGDSWFNCQKLKLP PGCGYEFQM QYGSIGWSVGATLGYAQA AKNRVIA  | 479 |
| AdPDC2 | ..GGD.....H..EN..F.....D.....                                   | 454 |
| AtPDC1 | .....K.....SPE...L...                                           | 480 |
| AtPDC2 | .....S..L.....E.....MP.R...                                     | 480 |
| AdPDC1 | CIGDGSFQVTAQDVSTMLRCGQKTIIFLINNGGYTIEVEIHDGPYNVIKNWNYTGLVDAI    | 539 |
| AdPDC2 | .....I...I..A.RS.....                                           | 514 |
| AtPDC1 | F.....V..I...N.....                                             | 540 |
| AtPDC2 | .....I.....AF.E..                                               | 540 |
| AdPDC1 | HNGEGKCWTTKVHCEEELIEAIGTATGAKKDCLCFIEVIVHKDDTSKELLEWGSRVAAAN    | 599 |
| AdPDC2 | .....A..RT..Q.A...A...EVH..S.....I.....S...                     | 574 |
| AtPDC1 | .....N...A..RY...V...T...TE.....L.....S...                      | 600 |
| AtPDC2 | .....A..R.....VK..N...NEE.ESF.....S...                          | 600 |
| AdPDC1 | GRPPNPQ                                                         | 606 |
| AdPDC2 | S.....                                                          | 581 |
| AtPDC1 | S.....                                                          | 607 |
| AtPDC2 | S.....                                                          | 607 |

Figure S2. Amino acid sequence identity of *A. deliciosa* AdPDC1 and AdPDC2 with *A. thaliana* AtPDC1 and AtPDC2. AtPDC1: *A. thaliana* PDC1 (GenBank accession no. NP\_200307); AtPDC2: *A. thaliana* PDC2 (GenBank accession no. NP\_195033). AdPDC1: *A. deliciosa* AdPDC1 (GenBank accession no. ALX37952). Dots indicate that the amino acid residues were conserved in each group, and transverse lines suggest gaps in amino acid sequences.

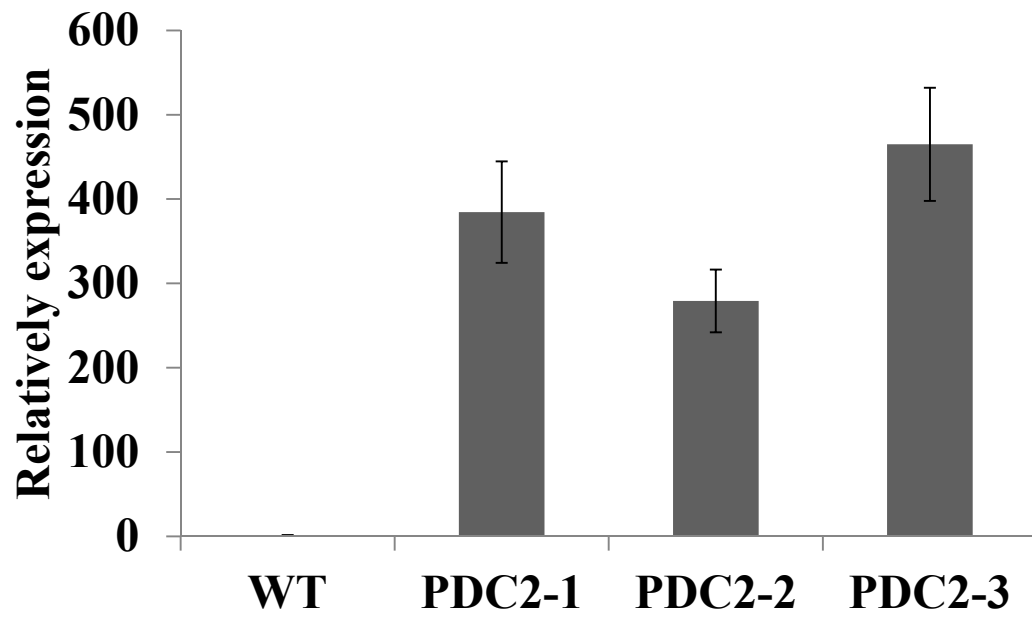

Fig. S3 Molecular confirmation of MdPDC2 transgenic Arabidopsis plants using qRT-PCR WT: Wild type; PDC2-1, PDC2-2 PDC2-3: transgenic lines. The data presented are the mean  $\pm$  SD.

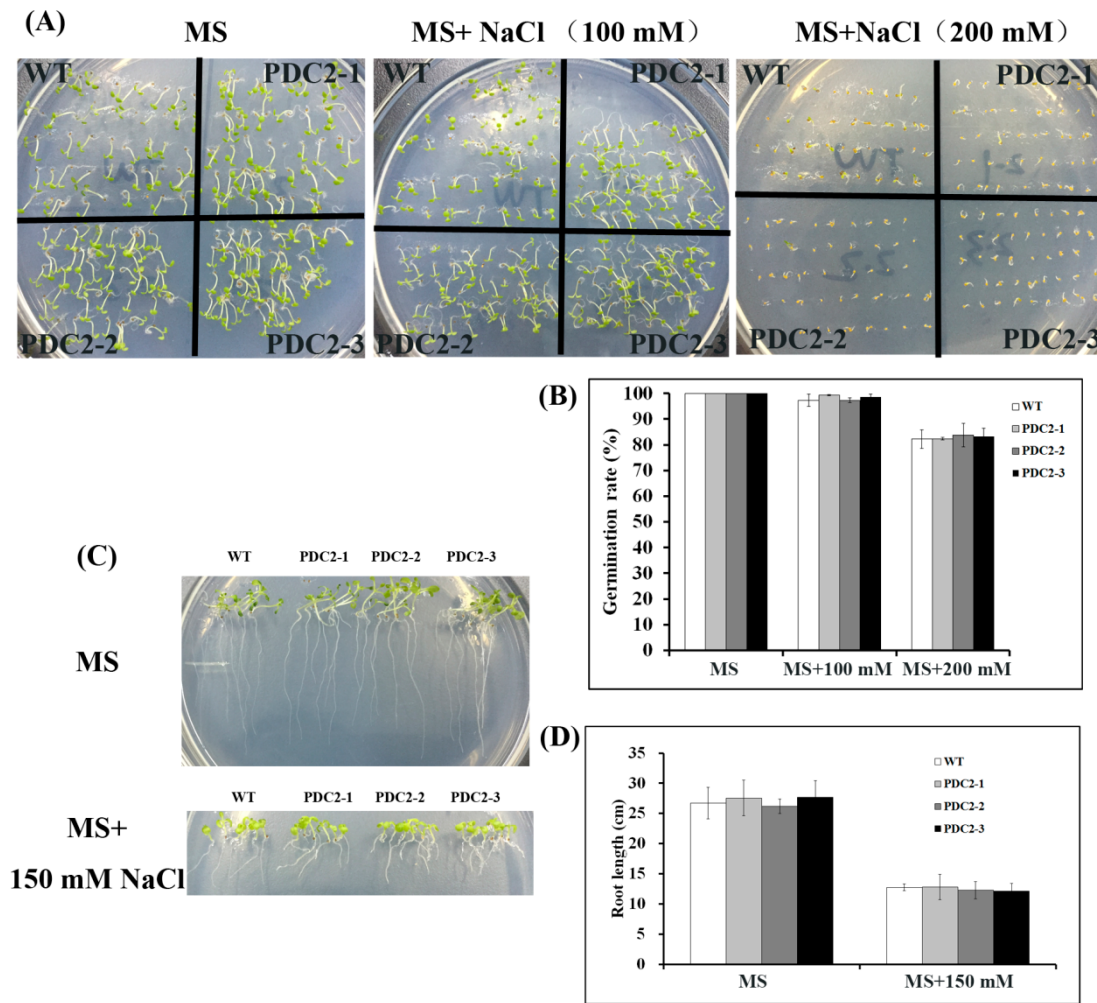

Figure S4 Transgenic *Arabidopsis* overexpression of *AdPDC2* (PDC2-1, PDC2-2 and PDC2-3) and wild-type (WT) were used to detect the salinity tolerance. A: Photographs were taken 10 days after seed germination of WT and transgenic *Arabidopsis* plants in MS medium containing various concentrations of NaCl (0, 100 mM and 200 mM). B: Germination rates in WT and transgenic plants grown in MS (control) or MS supplemented with various concentrations of NaCl (100 mM and 200 mM) for 7 days. 50 seeds of each line were grown for each experiment. C: Comparison of root length between transgenic and WT lines under NaCl stress. Four day-old seedlings of WT and transgenic seedlings which were germinated just from MS agar medium were transferred to MS medium containing NaCl (150 mM). The phenotype (C) and root length (D) were measured after 7 days. The experiments were carried out on three replicates of 30 seedlings. The results from one set of experiments are shown. Results are presented as mean  $\pm$  SD from three independent experiments.

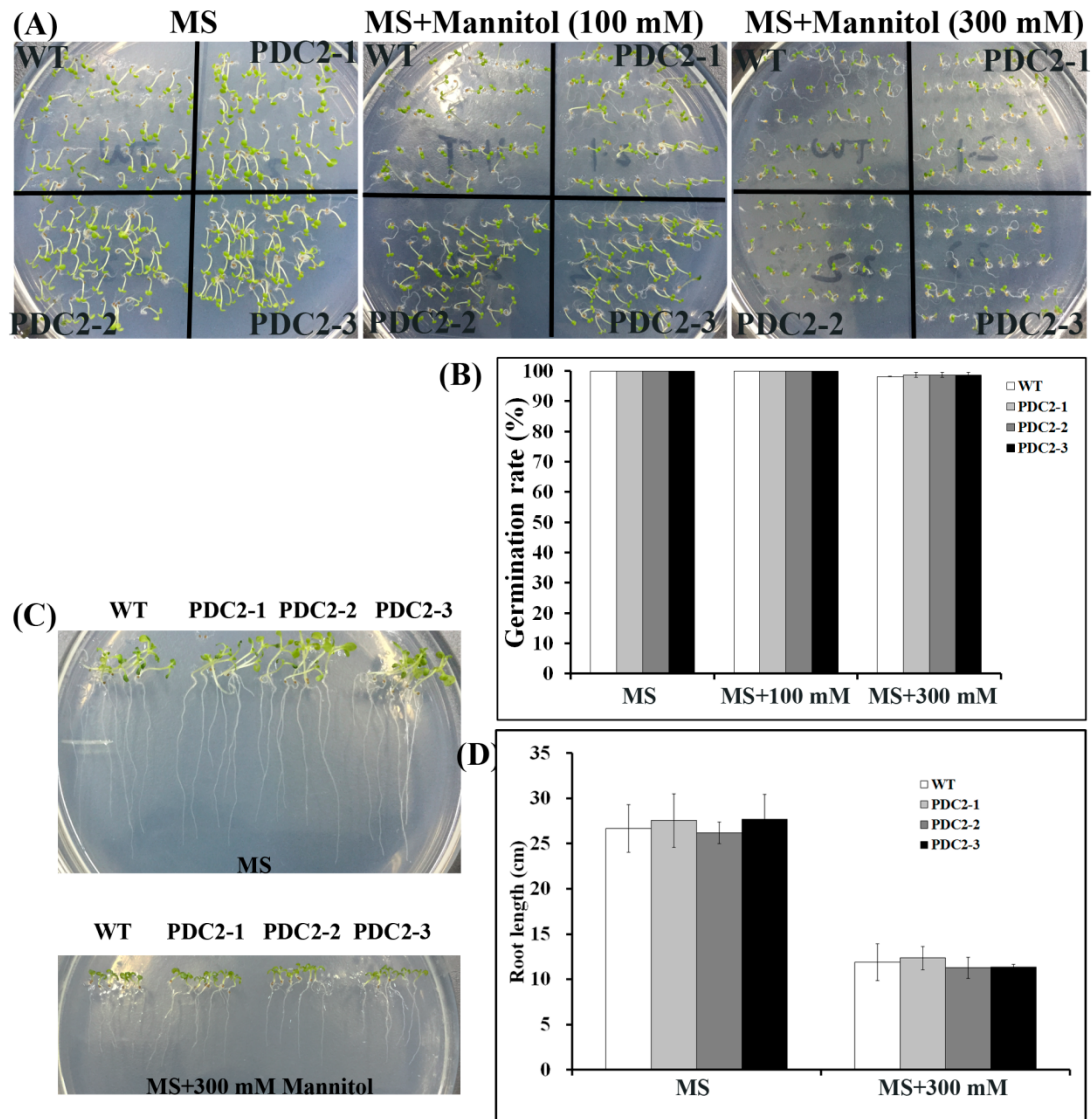

Figure S5 Transgenic *Arabidopsis* overexpression of *AdPDC2* (PDC2-1, PDC2-2 and PDC2-3) and wild-type (WT) were used to detect the mannitol tolerance. Photographs were taken 10 days after seed germination of WT and transgenic *Arabidopsis* plants in MS medium, MS medium containing 100 mM mannitol and 300 mM mannitol (A). B: Germination rates in WT and transgenic plants grown in MS (control) or MS supplemented with various concentrations of mannitol (100 mM and 300 mM) for 7 days. 50 seeds of each line were grown for each experiment. C: Comparison of root length between transgenic and WT lines under mannitol stress. Four day-old seedlings of WT and transgenic seedlings which were germinated just from MS agar medium were transferred to MS medium containing mannitol (300 mM). The phenotype (C) and root length (D) were measured after 7 days. The experiments were carried out on three replicates of 30 seedlings. The results from one set of experiments are shown. Results are presented as mean  $\pm$  SD from three independent experiments
